# Supplementary material for: The oxidative balance score impacts serum FT4 levels and all-cause mortality in Euthyroid Participants
Source: Research Square preprint supplement (doi:10.21203/rs.3.rs-4973287/v1), 2024-10-22
Supplement: Supplementary file 1 [file 3f60c0193a350f6c8baf8500.docx]

Supplementary Material

**The oxidative balance score impacts serum FT4 levels and all-cause mortality in Euthyroid Participants**

Qianqian Xiao 1,2,†, Zhanqin Zhang 3,†, Shuman Ji 1, Muzi Li 4, Bohua Zhang 3, Qing Xu 1, Chang Xiao 3, Huaijin Guan 5, Lei Ma2 *, Xiaopeng Mei 1 *

| **Table S1.** Oxidative balance score (OBS) items and score assignment | | | | |
| --- | --- | --- | --- | --- |
| OBS components | Assignment Scheme | | | |
| Dietary OBS components | |  |  |  |
| Dietary fiber (g/d) | A | 0 = low (1st tertile), 1 = intermediate (2nd tertile), 2 = high (3rd tertile) | | |
| Carotene (RE/d) | A | 0 = low (1st tertile), 1 = intermediate (2nd tertile), 2 = high (3rd tertile) | | |
| Riboflavin (mg/d) | A | 0 = low (1st tertile), 1 = intermediate (2nd tertile), 2 = high (3rd tertile) | | |
| Niacin (mg/d) | A | 0 = low (1st tertile), 1 = intermediate (2nd tertile), 2 = high (3rd tertile) | | |
| Vitamin B6 (mg/d) | A | 0 = low (1st tertile), 1 = intermediate (2nd tertile), 2 = high (3rd tertile) | | |
| Total folate (mcg/d) | A | 0 = low (1st tertile), 1 = intermediate (2nd tertile), 2 = high (3rd tertile) | | |
| Vitamin B12 (mcg/d) | A | 0 = low (1st tertile), 1 = intermediate (2nd tertile), 2 = high (3rd tertile) | | |
| Vitamin C (mg/d) | A | 0 = low (1st tertile), 1 = intermediate (2nd tertile), 2 = high (3rd tertile) | | |
| Vitamin E (ATE) (mg/d) | A | 0 = low (1st tertile), 1 = intermediate (2nd tertile), 2 = high (3rd tertile) | | |
| Calcium (mg/d) | A | 0 = low (1st tertile), 1 = intermediate (2nd tertile), 2 = high (3rd tertile) | | |
| Magnesium (mg/d) | A | 0 = low (1st tertile), 1 = intermediate (2nd tertile), 2 = high (3rd tertile) | | |
| Zinc (mg/d) | A | 0 = low (1st tertile), 1 = intermediate (2nd tertile), 2 = high (3rd tertile) | | |
| Copper (mg/d) | A | 0 = low (1st tertile), 1 = intermediate (2nd tertile), 2 = high (3rd tertile) | | |
| Selenium (mcg/d) | A | 0 = low (1st tertile), 1 = intermediate (2nd tertile), 2 = high (3rd tertile) | | |
| Total fat (g/d) | P | 0 = high (3rd tertile), 1 = intermediate (2nd tertile), 2 = low (1st tertile) | | |
| Iron (mg/d) | P | 0 = high (3rd tertile), 1 = intermediate (2nd tertile), 2 = low (1st tertile) | | |
| Lifestyle OBS components |  |  | | |
| Physical activity (MET-minute/week) | A | 0 = low (1st tertile), 1 = intermediate (2nd tertile), 2 = high (3rd tertile) | | |
| Alcohol drinking status | P | 0 = heavy drinker, 1 = mild-to-moderate drinker, 2 = non-drinker | | |
| Body mass index (kg/m2) | P | 0 = obese, 1 = overweight, 2= normal | | |
| Smoking status | P | 0 = current smoker, 1 = former smoker, 2 = never smoker | | |

OBS: oxidative balance score; A: antioxidant; P: prooxidant; RE: retinol equivalent; ATE: alpha-tocopherol equivalent; MET: metabolic equivalent.

| **Table S2.** Sensitivity analyses. | | |
| --- | --- | --- |
| OBS | FT4% (95% CI) | TSH% (95% CI) |
| Model 1 | | |
| Continuous | -2.28(-4.50,-0.23) * | 10.41(1.39,20.50) * |
| Q1 | Ref | Ref |
| Q2 | 0.93(-1.37,3.51) | -0.23(-9.43,9.65) |
| Q3 | -1.60(-4.10,0.69) | 10.66(0.69,21.62) * |
| Q4 | -2.05(-4.28,0.23) | 5.20(-4.28,15.35) |
| P for trend | 0.008 | 0.092 |
| Model 2 | | |
| Continuous | -3.17(-5.38,-0.92) * | 6.66(-2.28,16.68) |
| Q1 | Ref | Ref |
| Q2 | 0.23(-2.05,2.80) | -2.50(-11.08,7.15) |
| Q3 | -2.50(-4.72,-0.23) * | 5.93(-3.62,16.41) |
| Q4 | -2.95(-5.16,-0.69) * | 2.09(-7.10,12.20) |
| P for trend | 0.001 | 0.34 |
| Model 3 | | |
| Continuous | -3.62(-5.81,-1.37) * | 5.93(-3.39,15.88) |
| Q1 | Ref | Ref |
| Q2 | 0.23(-2.28,2.57) | -2.50(-11.28,7.15) |
| Q3 | -2.95(-5.16,-0.46) * | 4.95(-4.72,15.61) |
| Q4 | -3.39(-5.81,-0.92) * | 1.62(-7.74,11.69) |
| P for trend | <0.001 | 0.429 |

Abbreviations: FT4, free thyroxine; TSH, thyroid-stimulating hormone; Q, quartile; OBS, Oxidative Balance Score. Estimates are derived from a complex survey design, with three models utilized: Model 1 (unadjusted), Model 2 (adjusted for Age, Gender, Race), and Model 3 (adjusted for Age, Gender, Race, Education, and UIC). In the model, natural logarithm conversion was applied to adjust OBS and thyroid function indexes. The results were presented as the percentage difference in serum thyroid function per 10-unit increase in OBS. Percent differences = [e(ln10×β) – 1] × 100. *P < 0.05.

| **Table S3.** Association between oxidative balance scores and thyroid function in euthyroid participants by gender group stratification. | | |
| --- | --- | --- |
| OBS | FT4% (95% CI) | TSH% (95% CI) |
| Male N=3066 | -4.04(-7.10,-0.69) * | 4.71(-6.67,20.23) |
| Female N=2661 | -2.73(-5.59,0.23) | 2.33(-10.87,14.82) |
| p for interaction | 0.701 | 0.671 |

Abbreviations: TSH, thyroid-stimulating hormone; FT4, free thyroxine; OBS, Oxidative Balance Score. Estimates are derived from a complex survey design, Age, Gender, Race, Education level, and UIC were adjusted. In the model, natural logarithm conversion was applied to adjust OBS and thyroid function indexes. The results were presented as the percentage difference in serum thyroid function per 10-unit increase in OBS. Percent differences = [e(ln10×β) – 1] × 100. *P < 0.05.

**Table S4.** Mediation analysis between OBS and all-cause mortality by gender group stratification.

|  | Total effect | | Indirect effect | | Direct effect | | Proportion mediated, %  (95% CI) |
| --- | --- | --- | --- | --- | --- | --- | --- |
| Coefficient (95% CI) | P value | Coefficient (95% CI) | P value | Coefficient (95% CI) | P value |
| Male | 10.97  (4.22, 16.77) | 0.008 | 0.58  (0.11, 1.37) | 0.012 | 10.38  (3.63, 16.03) | 0.012 | 5.3 (0.9, 16.0) |
| Female | 24.01  (-2.93,319.24) | 0.076 | 1.65  (0.05,62.79) | 0.040 | 22.36  (-6.08, 257.14) | 0.096 | 6.9 (-22.3, 40.9) |

Adjusted for Age, Gender, Race, Education, Diabetes mellitus, Hypertension, Hyperlipidemia, and Cardiovascular Disease.
